# Supplementary material for: The titanium tris-anilide cation [Ti(N[tBu]Ar)3]+stabilized as its perfluoro-tetra-phenylborate salt: structural characterization and synthesis in connection with redox activity of 4,4′-bipyridine dititanium complexes
Source: Royal Society of Chemistry journal article supplement (doi:10.1039/c5dt00105f), 2015-01-01
Supplement: c5dt00105f1.pdf [file c5dt00105f1.pdf]

Supporting Information for Paper Entitled:

“The titanium *tris*-anilide cation  $[\text{Ti}(\text{N}[\textit{t}\text{Bu}]\text{Ar})_3]^+$   
stabilized as its perfluoro-*tetra*-phenylborate salt:  
structural characterization and synthesis in  
connection with redox activity of 4,4'-bipyridine  
dititanium complexes”

Heather A. Spinney, Christopher R. Clough, and Christopher C. Cummins\*

*Department of Chemistry  
Massachusetts Institute of Technology  
77 Massachusetts Avenue, Room 6-435  
Cambridge, Massachusetts, 02139 (USA)*

**Contents:**

|                                      |    |
|--------------------------------------|----|
| Figures of Spectra .....             | 2  |
| X-ray Crystallography Tables.....    | 13 |
| Optimized Geometry Coordinates ..... | 15 |

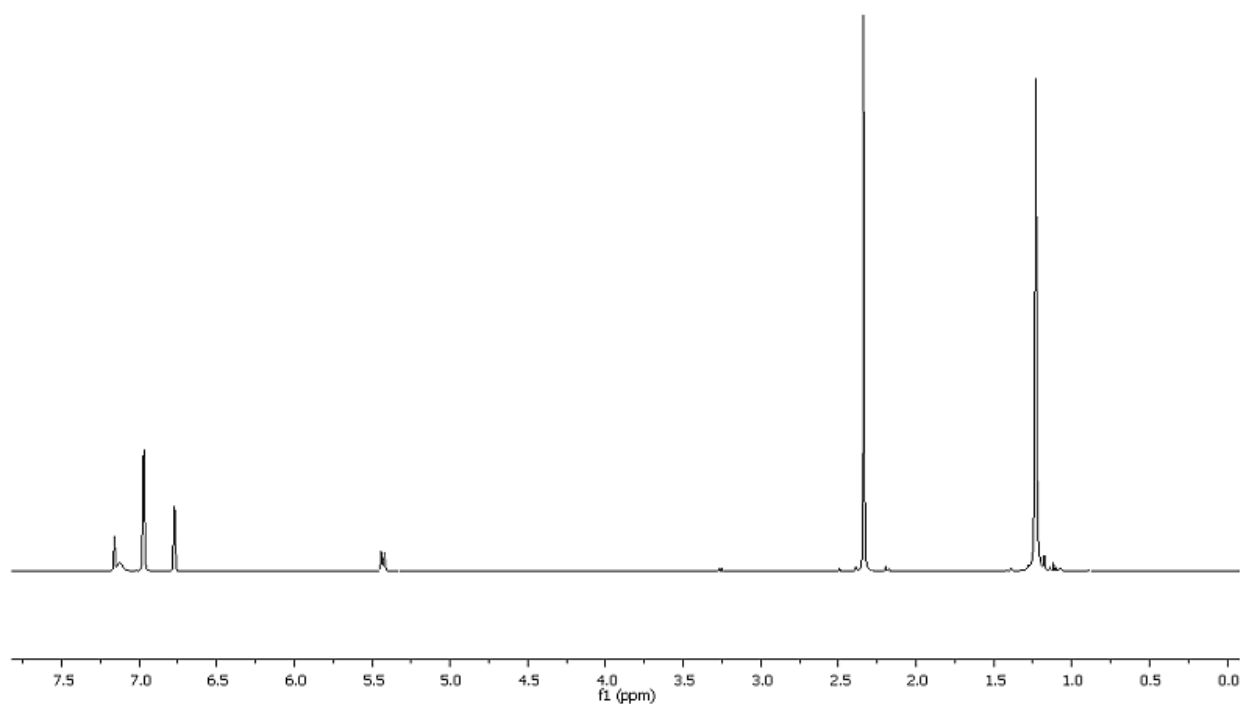

Figure S1. <sup>1</sup>H NMR spectrum of (4,4'-bipy){Ti(N[<sup>t</sup>Bu]Ar)<sub>3</sub>}<sub>2</sub> in C<sub>6</sub>D<sub>6</sub>.

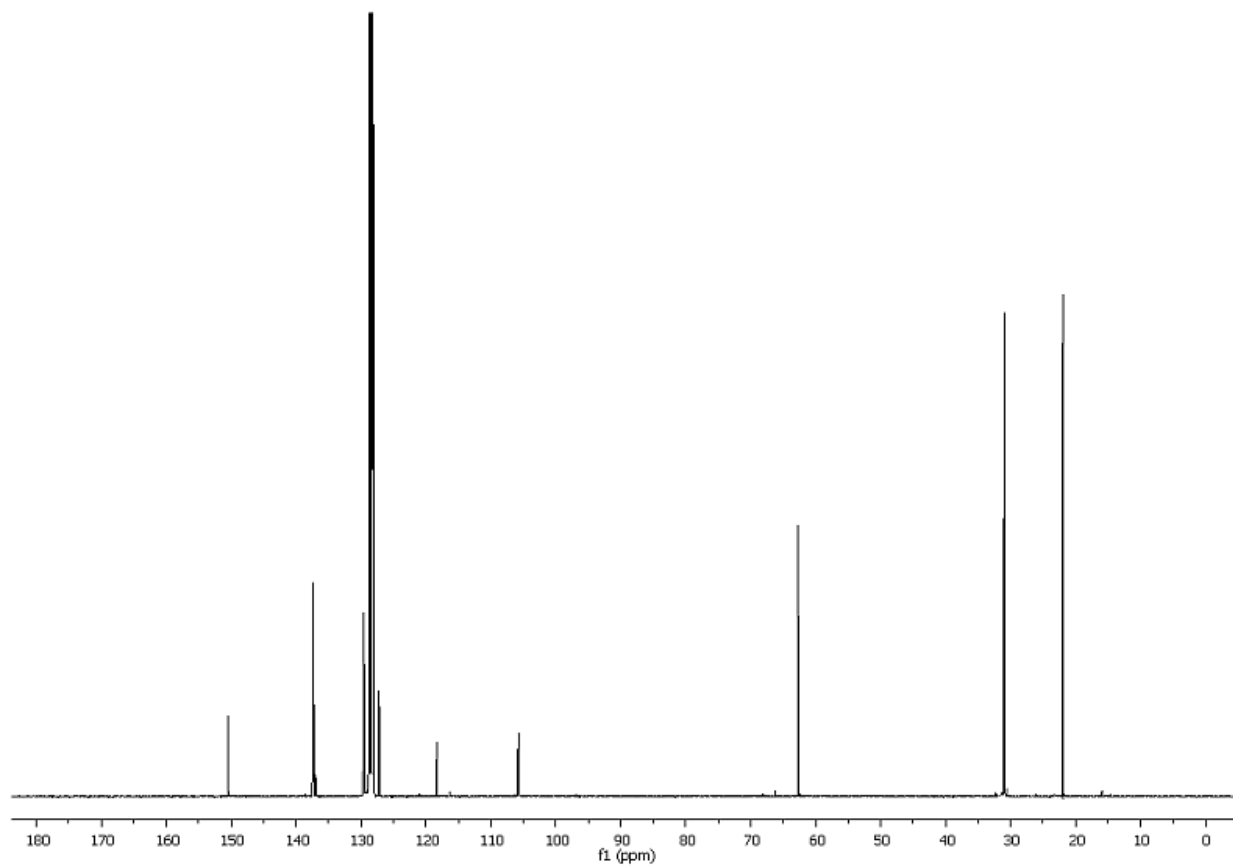

Figure S2. <sup>13</sup>C NMR spectrum of (4,4'-bipy){Ti(N[<sup>t</sup>Bu]Ar)<sub>3</sub>}<sub>2</sub> in C<sub>6</sub>D<sub>6</sub>.

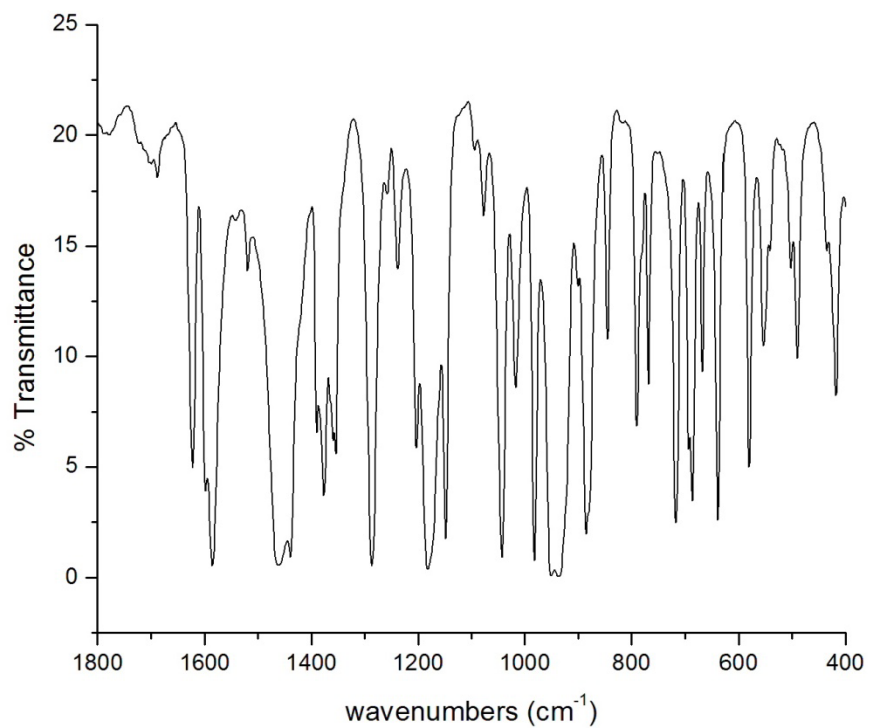

Figure S3. Ir spectrum (nujol mull) of (4,4'-bipy){Ti(N[<sup>'</sup>Bu]Ar)<sub>3</sub>}<sub>2</sub>.

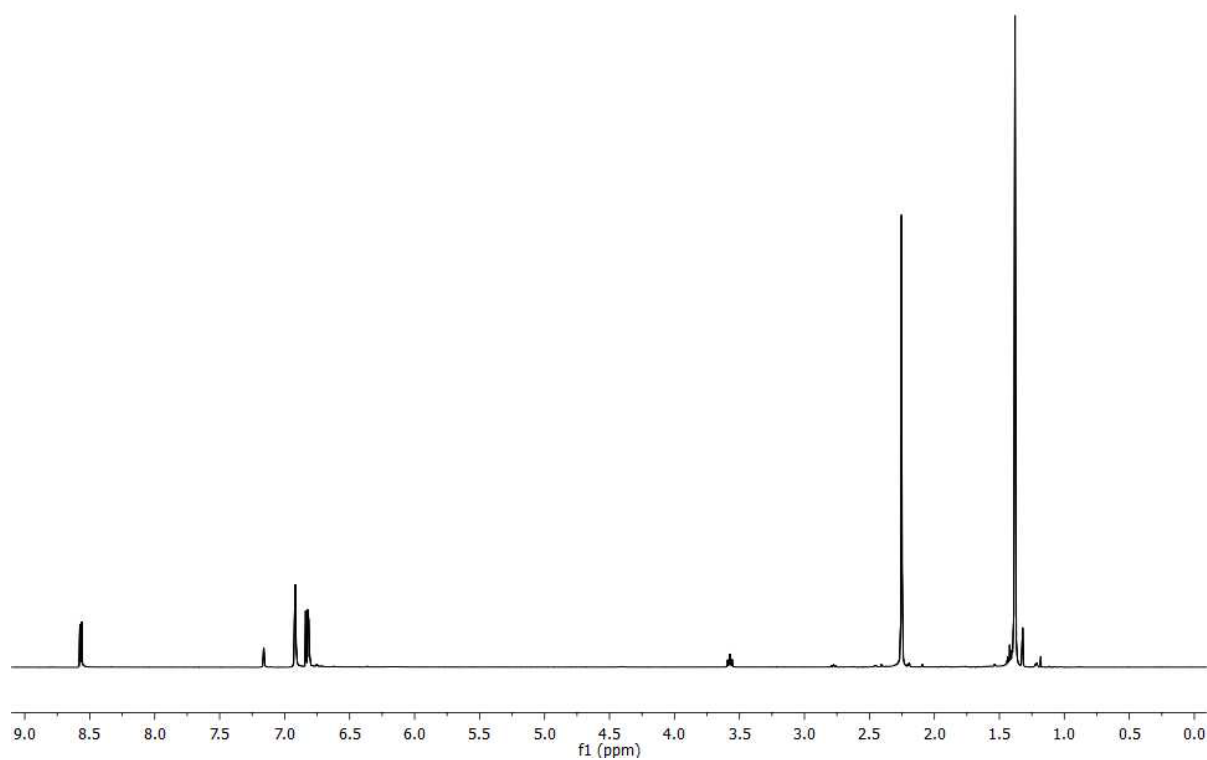

Figure S4. <sup>1</sup>H NMR spectrum of mixture of ITi(N[<sup>'</sup>Bu]Ar)<sub>3</sub> and 4,4'-bipyridine, resulting from treatment of (4,4'-bipy){Ti(N[<sup>'</sup>Bu]Ar)<sub>3</sub>}<sub>2</sub> with I<sub>2</sub>.

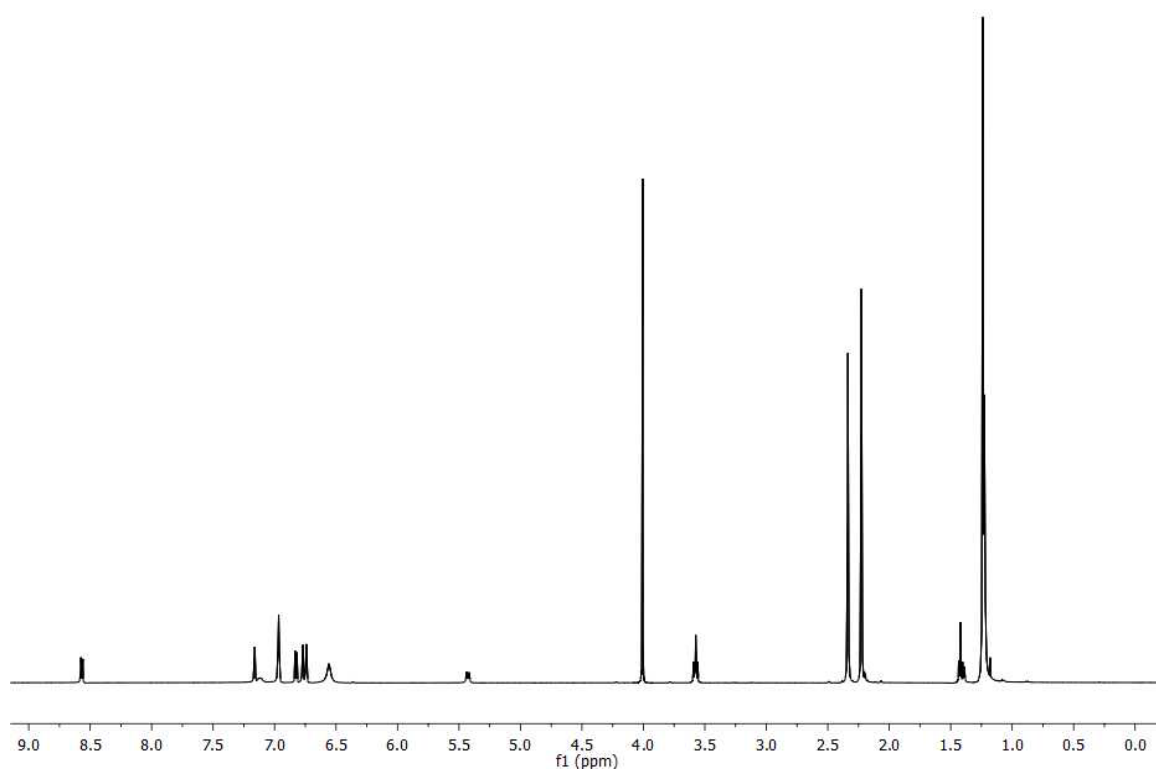

Figure S5. <sup>1</sup>H NMR spectrum of mixture of (4,4'-bipy){Ti(N[*t*-Bu]Ar)<sub>3</sub>}<sub>2</sub>, TfOTi(N[*t*-Bu]Ar)<sub>3</sub>, 4,4'-bipyridine, and ferrocene.

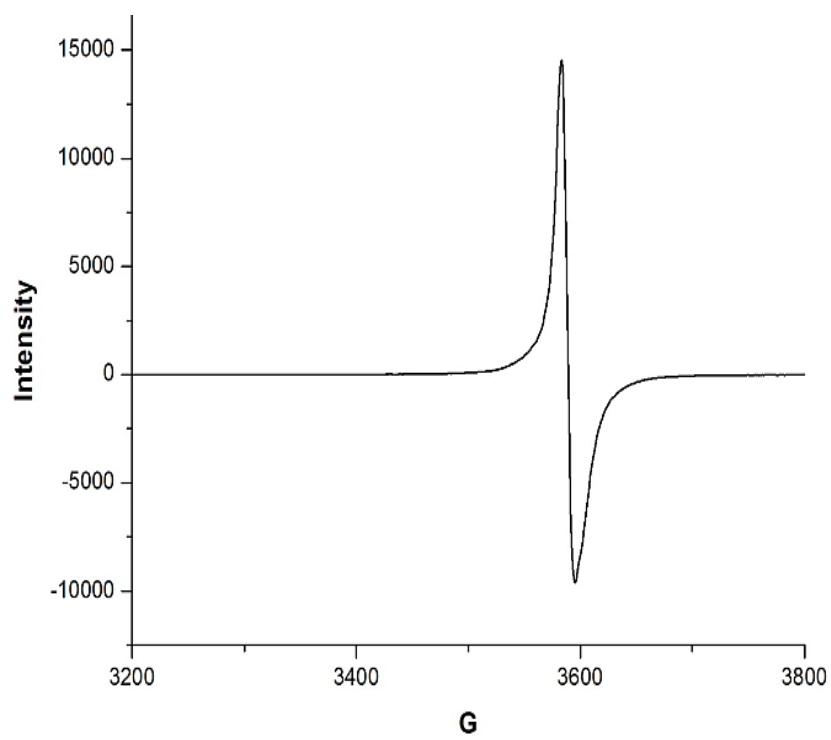

Figure S6. EPR spectrum of material isolated from treatment of (4,4'-bipy){Ti(N[<sup>t</sup>Bu]Ar)<sub>3</sub>}<sub>2</sub> with excess 1% Na/Hg (C<sub>6</sub>D<sub>6</sub>).

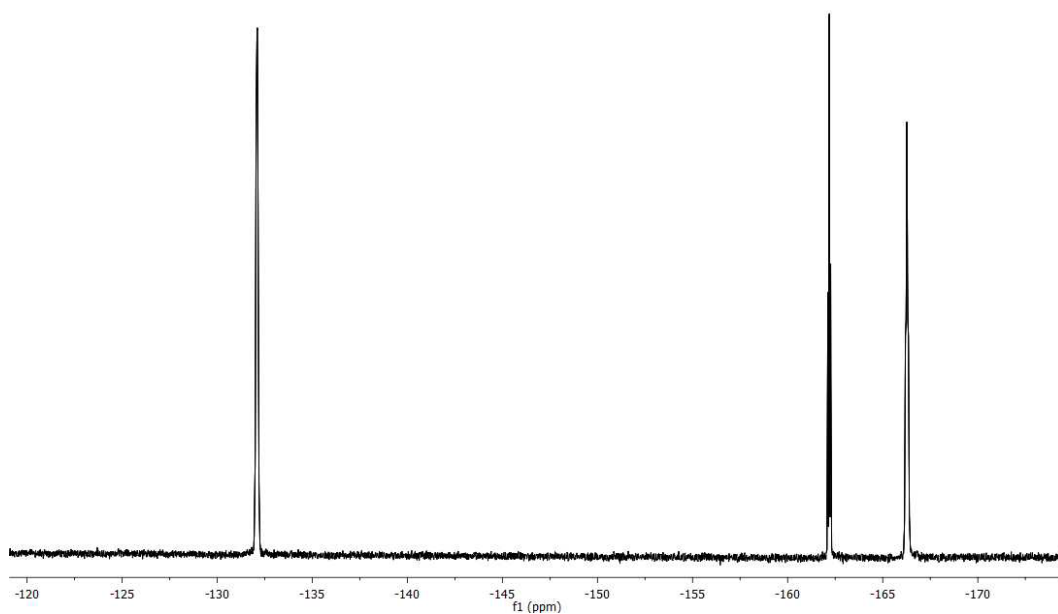

Figure S7. <sup>19</sup>F{<sup>1</sup>H} NMR spectrum of FcB(C<sub>6</sub>F<sub>5</sub>)<sub>4</sub> in THF.

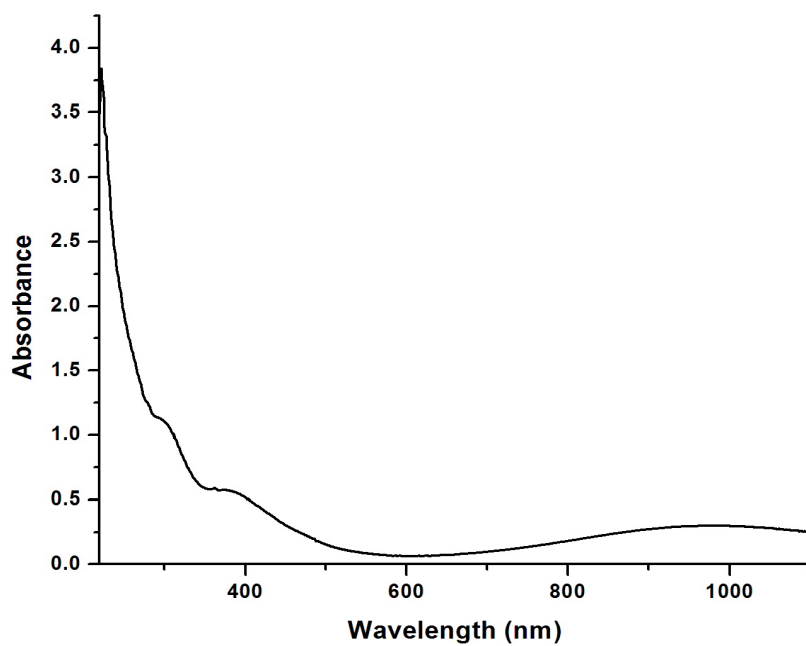

Figure S8. UV/Visible absorbance spectrum of [(4,4'-bipy){Ti(N[<sup>t</sup>Bu]Ar)<sub>3</sub>}<sub>2</sub>][B(C<sub>6</sub>F<sub>5</sub>)<sub>4</sub>] in THF solution.

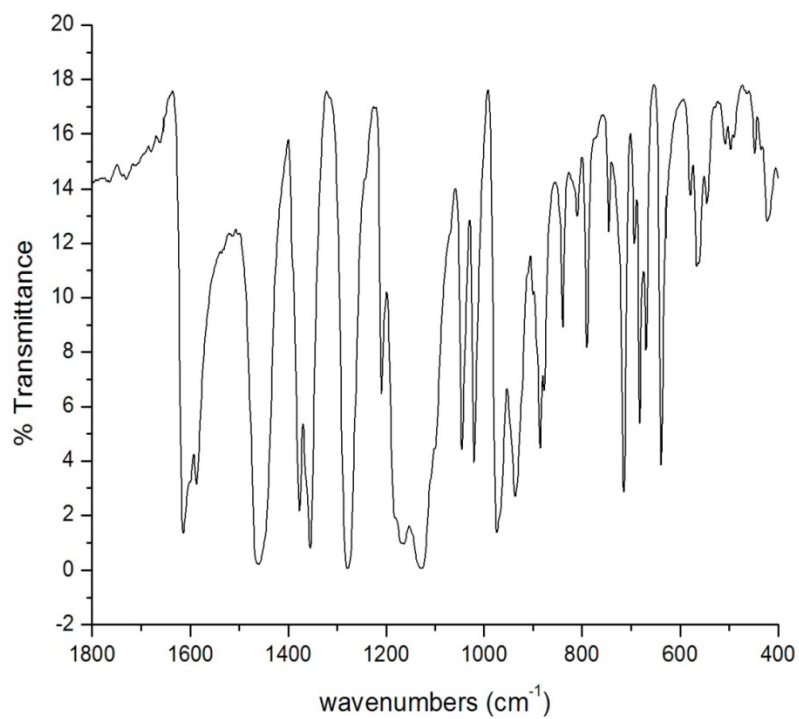

Figure S9. Ir spectrum (nujol mull) of  $[(4,4'\text{-bipy})\{\text{Ti}(\text{N}[\text{'Bu}]\text{Ar})_3\}_2][\text{B}(\text{C}_6\text{F}_5)_4]$ .

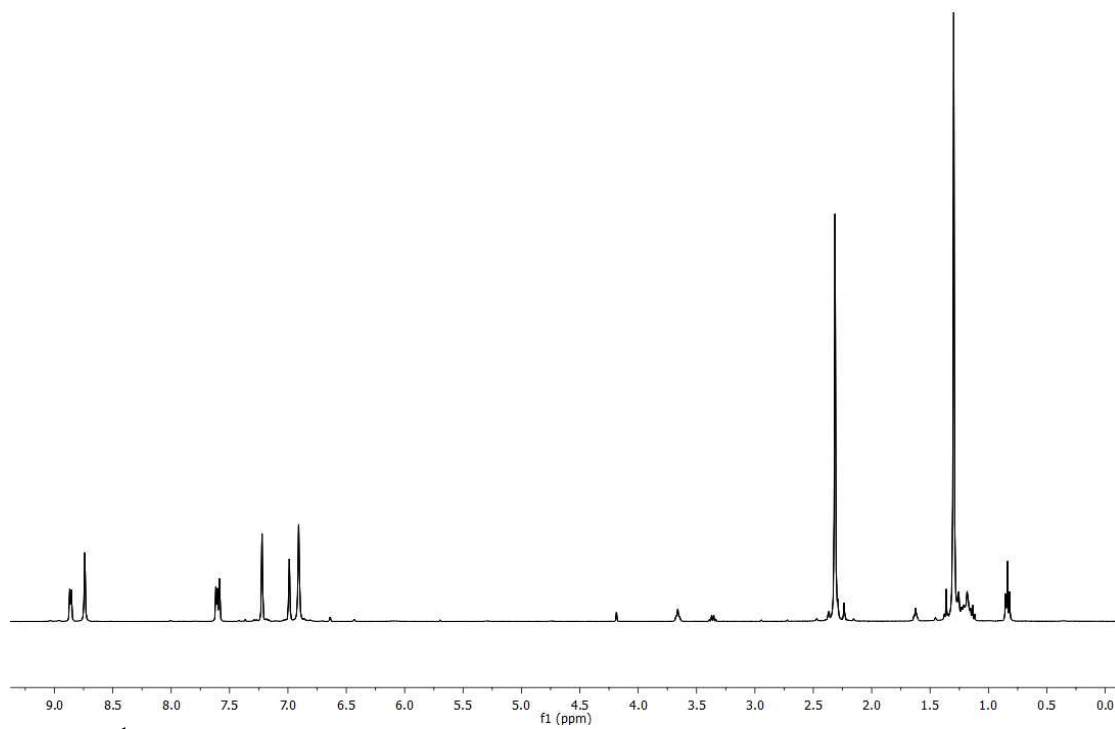

Figure S10.  $^1\text{H}$  NMR spectrum of  $[(4,4'\text{-bipy})\{\text{Ti}(\text{N}[\text{'Bu}]\text{Ar})_3\}_2][\text{B}(\text{C}_6\text{F}_5)_4]_2$  in pyridine- $d_5$ .

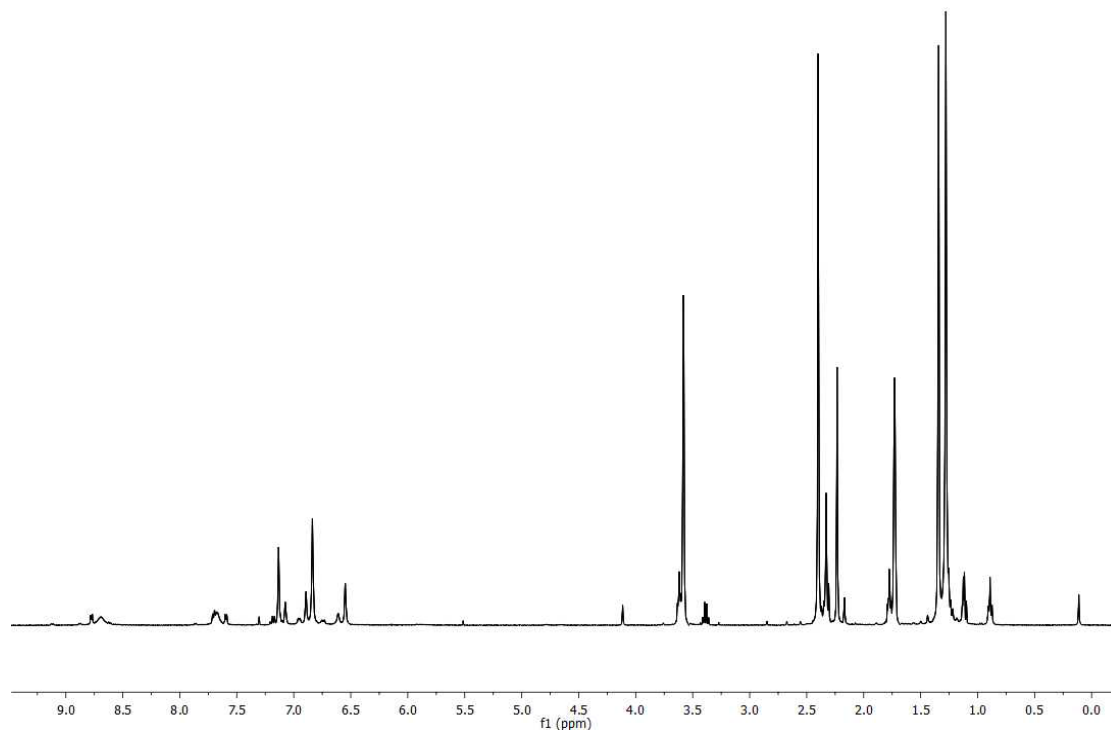

Figure S11.  $^1\text{H}$  NMR spectrum of  $[(4,4'\text{-bipy})\{\text{Ti}(\text{N}[4\text{-tBu}]\text{Ar})_3\}_2][\text{B}(\text{C}_6\text{F}_5)_4]_2$  in  $\text{THF-}d_8$ .

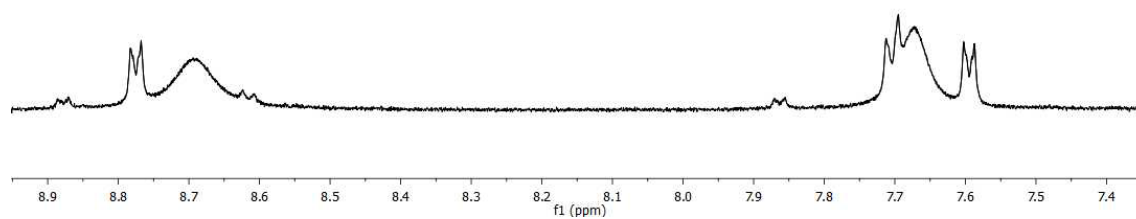

Figure S12. Blow up of 4,4'-bipyridine region of spectrum in Figure S11.

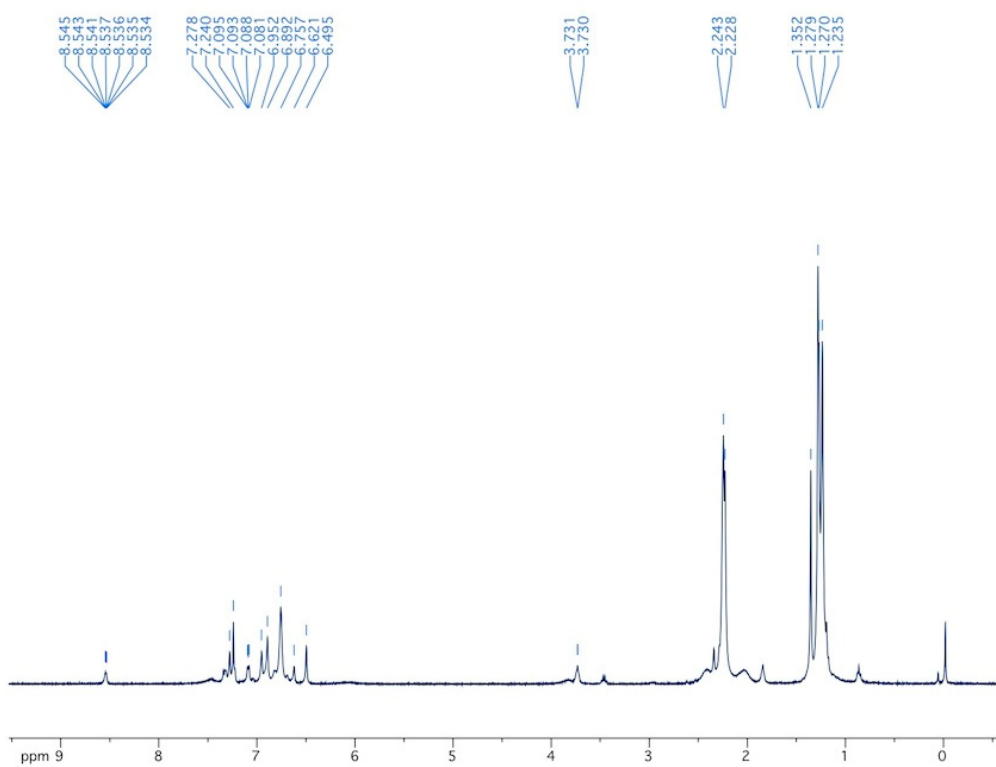

Figure S13.  $^1\text{H}$  NMR spectrum of  $[(4,4'\text{-bipy})\{\text{Ti}(\text{N}[4\text{-tBu}]\text{Ar})_3\}_2][\text{B}(\text{C}_6\text{F}_5)_4]_2$  in  $\text{CDCl}_3$ .

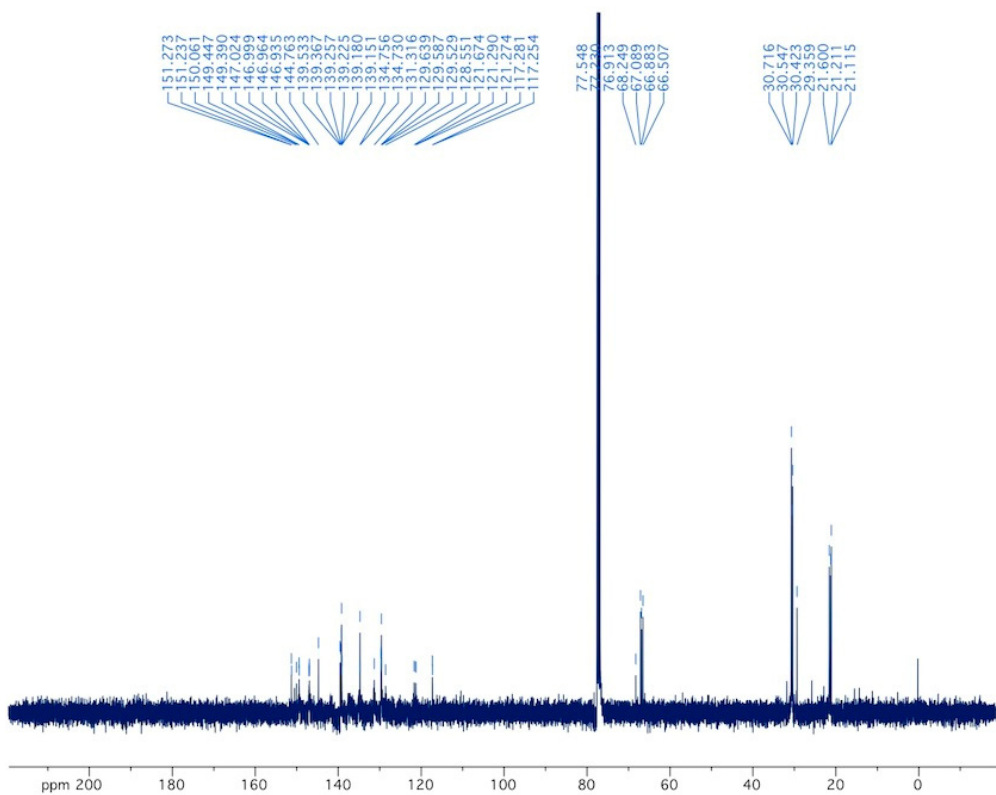

Figure S14.  $^{13}\text{C}\{^1\text{H}\}$  NMR spectrum of  $[(4,4'\text{-bipy})\{\text{Ti}(\text{N}[4\text{-tBu}]\text{Ar})_3\}_2][\text{B}(\text{C}_6\text{F}_5)_4]_2$  in  $\text{CDCl}_3$ .



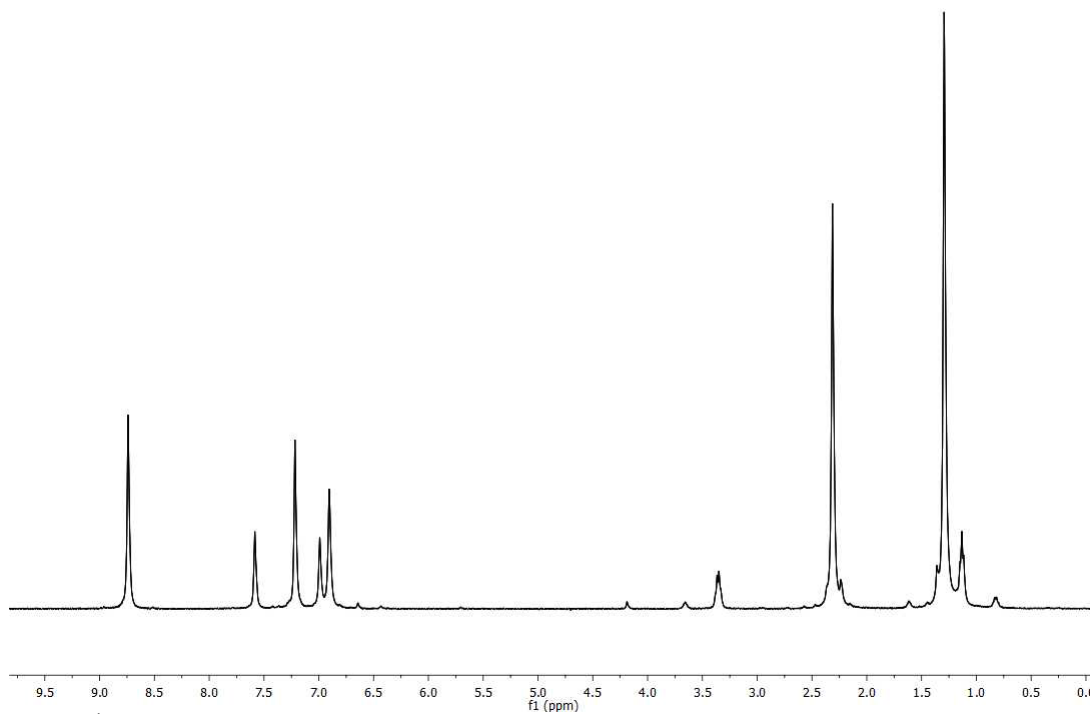

Figure S15.  $^1\text{H}$  NMR spectrum of  $[\text{Ti}(\text{N}[4\text{-tBu}]\text{Ar})_3][\text{B}(\text{C}_6\text{F}_5)_4]$  in pyridine- $d_5$ .

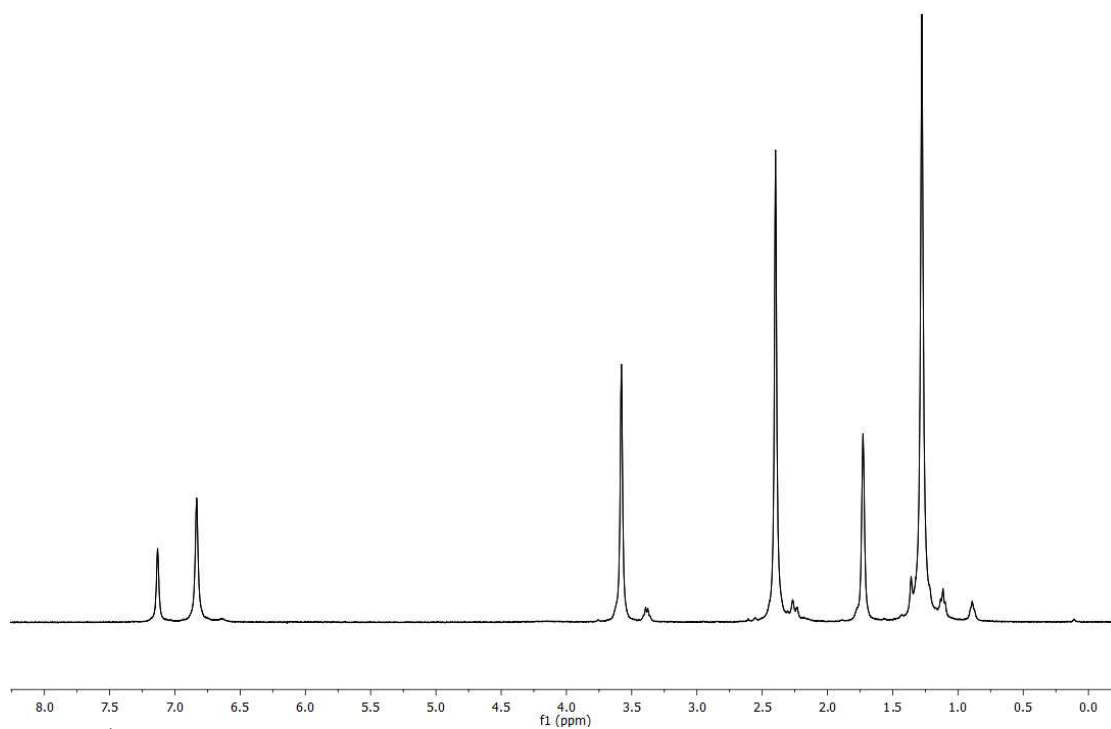

Figure S16.  $^1\text{H}$  NMR spectrum of  $[\text{Ti}(\text{N}[4\text{-tBu}]\text{Ar})_3][\text{B}(\text{C}_6\text{F}_5)_4]$  in THF- $d_8$ .

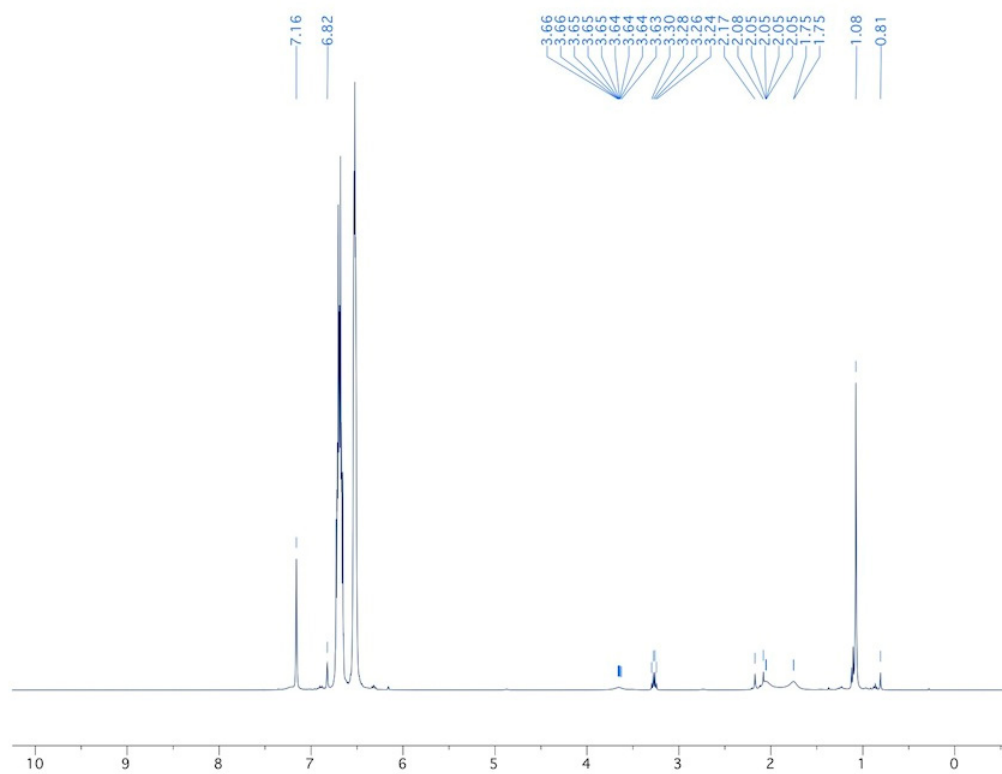

Figure S17. <sup>1</sup>H NMR spectrum of [Ti(N[<sup>t</sup>Bu]Ar)<sub>3</sub>][B(C<sub>6</sub>F<sub>5</sub>)<sub>4</sub>] in C<sub>6</sub>D<sub>6</sub>/*o*-difluorobenzene.

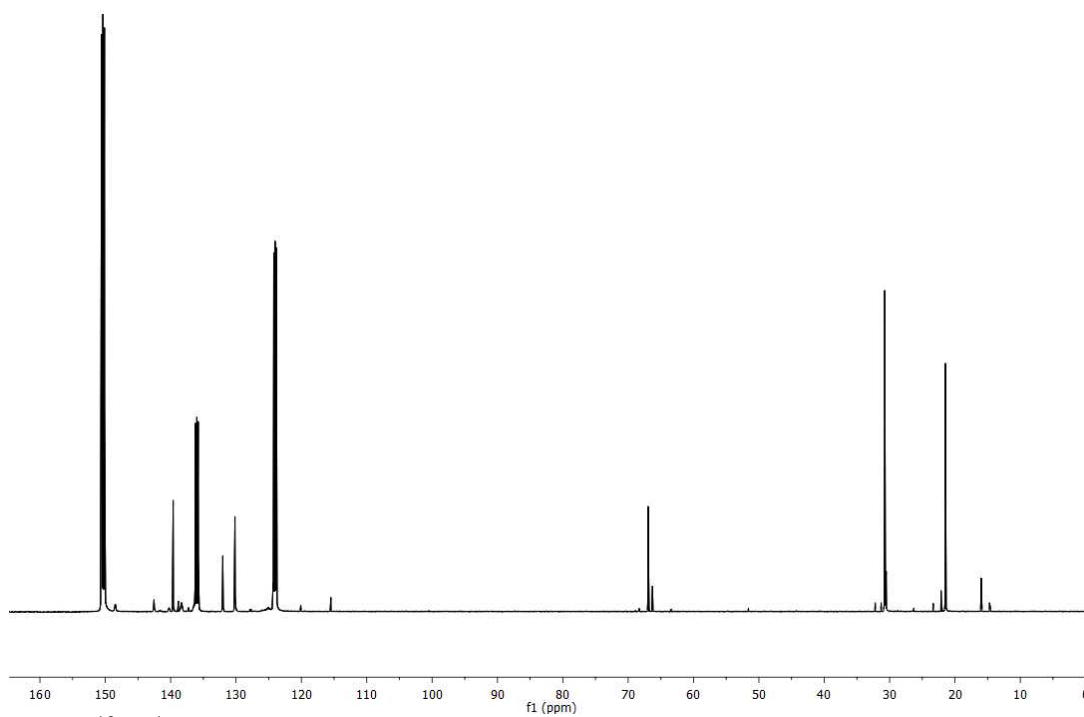

Figure S18. <sup>13</sup>C{<sup>1</sup>H} NMR spectrum of [Ti(N[<sup>t</sup>Bu]Ar)<sub>3</sub>][B(C<sub>6</sub>F<sub>5</sub>)<sub>4</sub>] in pyridine-*d*<sub>5</sub>.

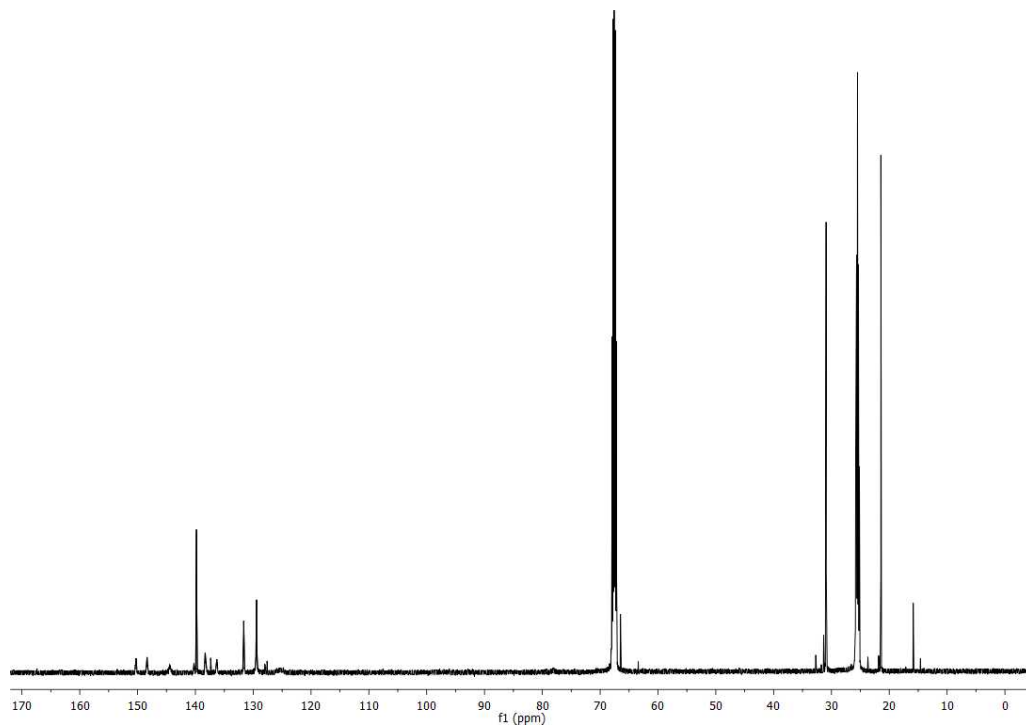

Figure S19.  $^{13}\text{C}\{^1\text{H}\}$  NMR spectrum of  $[\text{Ti}(\text{N}[4\text{-tBu}]\text{Ar})_3][\text{B}(\text{C}_6\text{F}_5)_4]$  in  $\text{THF-}d_8$ .

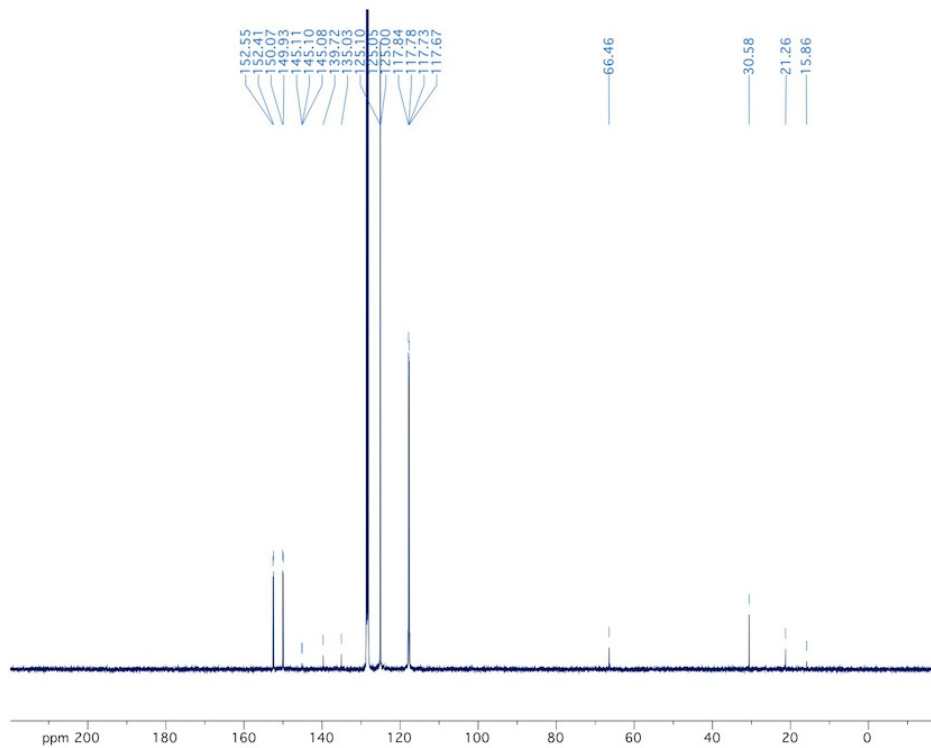

Figure S21.  $^{13}\text{C}\{^1\text{H}\}$  NMR spectrum of  $[\text{Ti}(\text{N}[4\text{-tBu}]\text{Ar})_3][\text{B}(\text{C}_6\text{F}_5)_4]$  in  $\text{C}_6\text{D}_6/o\text{-difluorobenzene}$ .

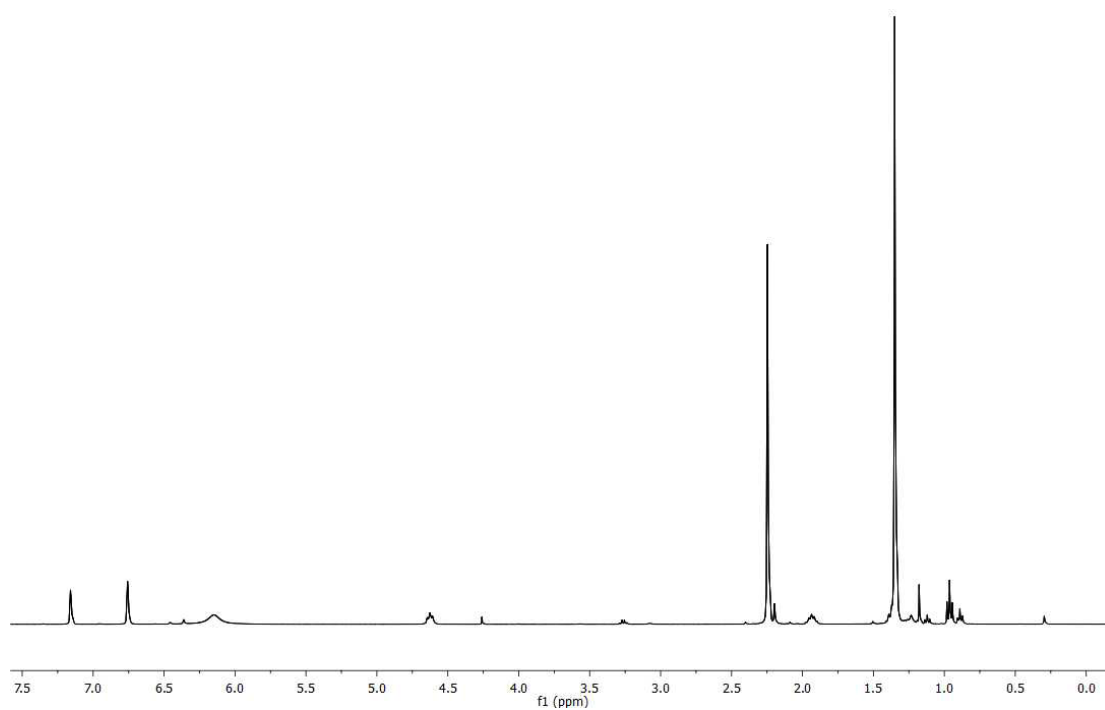

Figure S22.  $^1\text{H}$  NMR spectrum of  $n\text{BuOTi}(\text{N}[^{13}\text{Bu}]\text{Ar})_3$  in  $\text{C}_6\text{D}_6$ .

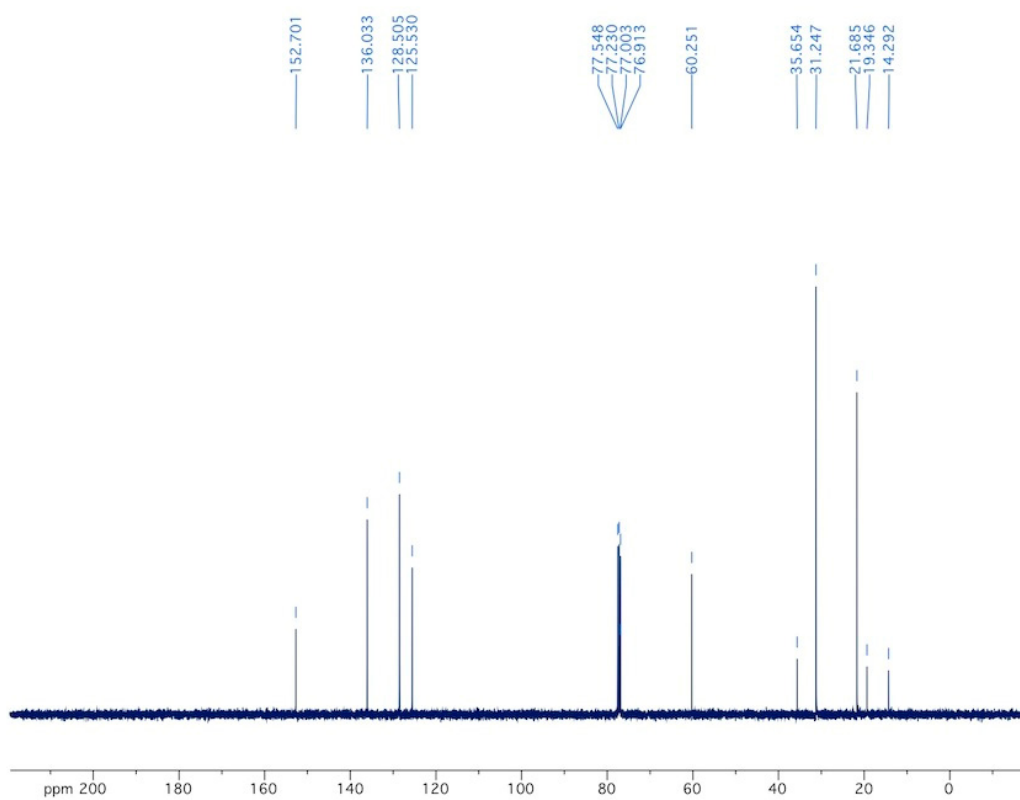

Figure S23.  $^{13}\text{C}\{^1\text{H}\}$  NMR spectrum of  $n\text{BuOTi}(\text{N}[^{13}\text{Bu}]\text{Ar})_3$  in  $\text{CDCl}_3$ .

**Table S1:** Crystallographic Data for **2**, **4**·(*o*-F<sub>2</sub>C<sub>6</sub>H<sub>4</sub>), and **5**·(THF)(Et<sub>2</sub>O) where **2** = (4,4'-bipy){Ti(N[<sup>t</sup>Bu]Ar)<sub>3</sub>}<sub>2</sub>, **4** = [(4,4'-bipy){Ti(N[<sup>t</sup>Bu]Ar)<sub>3</sub>}<sub>2</sub>][B(C<sub>6</sub>F<sub>5</sub>)<sub>4</sub>]<sub>2</sub>, and **5**·(THF) = [(THF)Ti(N[<sup>t</sup>Bu]Ar)<sub>3</sub>][B(C<sub>6</sub>F<sub>5</sub>)<sub>4</sub>].

|                                                              | <b>2</b> ·(C <sub>7</sub> H <sub>8</sub> ) <sub>2</sub> (C <sub>5</sub> H <sub>12</sub> ) | <b>4</b> ·( <i>o</i> -F <sub>2</sub> C <sub>6</sub> H <sub>4</sub> )                            | <b>5</b> ·(THF)(Et <sub>2</sub> O)                                                |
|--------------------------------------------------------------|-------------------------------------------------------------------------------------------|-------------------------------------------------------------------------------------------------|-----------------------------------------------------------------------------------|
| CCDC No.                                                     | 893531                                                                                    | 893532                                                                                          | 893533                                                                            |
| Formula                                                      | C <sub>101</sub> H <sub>144</sub> N <sub>8</sub> Ti <sub>2</sub>                          | C <sub>136</sub> H <sub>120</sub> B <sub>2</sub> N <sub>8</sub> F <sub>42</sub> Ti <sub>2</sub> | C <sub>68</sub> H <sub>72</sub> BN <sub>3</sub> O <sub>2</sub> F <sub>20</sub> Ti |
| Color                                                        | orange                                                                                    | orange                                                                                          | orange                                                                            |
| Morphology                                                   | block                                                                                     | shard                                                                                           | block                                                                             |
| Size, mm <sup>3</sup>                                        | 0.50 × 0.50 × 0.35                                                                        | 0.44 × 0.15 × 0.06                                                                              | 0.36 × 0.21 × 0.10                                                                |
| Crystal System                                               | Triclinic                                                                                 | Triclinic                                                                                       | Triclinic                                                                         |
| Space Group                                                  | <i>P</i> -1                                                                               | <i>P</i> -1                                                                                     | <i>P</i> -1                                                                       |
| Wavelength, Å                                                | 0.71073                                                                                   | 0.71073                                                                                         | 0.71073                                                                           |
| Temperature, K                                               | 100(2)                                                                                    | 100(2)                                                                                          | 100(2)                                                                            |
| <i>a</i> , Å                                                 | 11.7441 (10)                                                                              | 12.9999(16)                                                                                     | 13.3000(11)                                                                       |
| <i>b</i> , Å                                                 | 14.5289 (12)                                                                              | 14.4638(18)                                                                                     | 13.5930(11)                                                                       |
| <i>c</i> , Å                                                 | 15.3188 (13)                                                                              | 35.939(5)                                                                                       | 19.2817(15)                                                                       |
| $\alpha$ , deg                                               | 80.1400(10)                                                                               | 82.097(2)                                                                                       | 107.9740(10)                                                                      |
| $\beta$ , deg                                                | 69.8540 (10)                                                                              | 80.086(2)                                                                                       | 95.3190(10)                                                                       |
| $\gamma$ , deg                                               | 71.3520(10)                                                                               | 83.947(2)                                                                                       | 95.813(2)                                                                         |
| <i>V</i> , Å <sup>3</sup>                                    | 2319.6(3)                                                                                 | 6570.2(14)                                                                                      | 3270.3(5)                                                                         |
| <i>Z</i>                                                     | 1                                                                                         | 2                                                                                               | 2                                                                                 |
| <i>D</i> <sub>x</sub> , g cm <sup>-3</sup>                   | 1.121                                                                                     | 1.406                                                                                           | 1.424                                                                             |
| <i>F</i> (000)                                               | 850                                                                                       | 2848                                                                                            | 1448                                                                              |
| $\mu$ , (Mo <i>K</i> $\alpha$ ), mm <sup>-1</sup>            | 0.221                                                                                     | 0.234                                                                                           | 0.235                                                                             |
| No. Reflections                                              | 60016                                                                                     | 137441                                                                                          | 77101                                                                             |
| No. Ind. Reflections                                         | 12435                                                                                     | 20905                                                                                           | 15001                                                                             |
| <i>R</i> <sub>int</sub>                                      | 0.0353                                                                                    | 0.0805                                                                                          | 0.0505                                                                            |
| $\theta_{\max}/\theta_{\min}$                                | 29.13 / 1.42                                                                              | 24.11 / 0.58                                                                                    | 27.48 / 1.55                                                                      |
| Completeness, %                                              | 99.7                                                                                      | 100.0                                                                                           | 100.0                                                                             |
| Goodness of Fit                                              | 1.058                                                                                     | 1.041                                                                                           | 1.030                                                                             |
| <i>R</i> ( <i>F</i> ) <sup>a</sup> ( <i>I</i> > 2 $\sigma$ ) | 0.0528                                                                                    | 0.0457                                                                                          | 0.0399                                                                            |
| <i>WR</i> ( <i>F</i> ) <sup>a</sup>                          | 0.1595                                                                                    | 0.1034                                                                                          | 0.0984                                                                            |
| Largest difference peak/hole (e/ Å <sup>3</sup> )            | + 1.402 / - 0.857                                                                         | + 0.284 / - 0.1034                                                                              | + 0.348 / - 0.378                                                                 |

<sup>a</sup> Quantity minimized =  $wR(F^2) = (\sum[w(F_o^2 - F_c^2)^2] / \sum[(wF_o^2)^2])^{1/2}$ ;  $R = \sum\Delta / \sum(F_o)$ ,  $\Delta = |F_o - F_c|$ ,  $w = 1/[\sigma^2(F_o^2) + (aP)^2 + bP]$ ,  $P = 2F_c^2 + \text{Max}(F_o, 0)/3$

**Table S2:** Crystallographic Data for **5** and **6**. Where **5** = [Ti(N[<sup>t</sup>Bu]Ar)<sub>3</sub>][B(C<sub>6</sub>F<sub>5</sub>)<sub>4</sub>] and **6** = <sup>n</sup>BuOTi(N[<sup>t</sup>Bu]Ar)<sub>3</sub>.

|                                                              | <b>5</b>                                                                 | <b>6</b>                                           |
|--------------------------------------------------------------|--------------------------------------------------------------------------|----------------------------------------------------|
| CCDC No.                                                     | 893534                                                                   | 893535                                             |
| Formula                                                      | C <sub>63</sub> H <sub>59.90</sub> BN <sub>3</sub> F <sub>20.22</sub> Ti | C <sub>40</sub> H <sub>63</sub> N <sub>3</sub> OTi |
| Color                                                        | orange                                                                   | yellow                                             |
| Morphology                                                   | block                                                                    | block                                              |
| Size, mm <sup>3</sup>                                        | 0.40 × 0.40 × 0.10                                                       | 0.30 × 0.30 × 0.21                                 |
| Crystal System                                               | Monoclinic                                                               | Cubic                                              |
| Space Group                                                  | <i>P</i> 2 <sub>1</sub> / <i>n</i>                                       | <i>P</i> <i>a</i> -3                               |
| Wavelength, Å                                                | 0.71073                                                                  | 0.71073                                            |
| Temperature, K                                               | 100(2)                                                                   | 100(2)                                             |
| <i>a</i> , Å                                                 | 16.8241(15)                                                              | 19.7299(9)                                         |
| <i>b</i> , Å                                                 | 20.9559(19)                                                              | 19.7299(9)                                         |
| <i>c</i> , Å                                                 | 17.3595(15)                                                              | 19.7299(9)                                         |
| $\alpha$ , deg                                               | 90                                                                       | 90                                                 |
| $\beta$ , deg                                                | 99.905(2)                                                                | 90                                                 |
| $\gamma$ , deg                                               | 90                                                                       | 90                                                 |
| <i>V</i> , Å <sup>3</sup>                                    | 6029.1(9)                                                                | 7680.2(6)                                          |
| <i>Z</i>                                                     | 4                                                                        | 8                                                  |
| <i>D</i> <sub>x</sub> , g cm <sup>-3</sup>                   | 1.434                                                                    | 1.125                                              |
| <i>F</i> (000)                                               | 2672                                                                     | 2832                                               |
| $\mu$ , (Mo <i>K</i> $\alpha$ ), mm <sup>-1</sup>            | 0.247                                                                    | 0.255                                              |
| No. Reflections                                              | 121467                                                                   | 166583                                             |
| No. Ind. Reflections                                         | 14973                                                                    | 3187                                               |
| <i>R</i> <sub>int</sub>                                      | 0.0796                                                                   | 0.0635                                             |
| $\theta_{\max}/\theta_{\min}$                                | 28.28 / 1.54                                                             | 28.26 / 1.79                                       |
| Completeness, %                                              | 100.0                                                                    | 100.0                                              |
| Goodness of Fit                                              | 1.006                                                                    | 1.076                                              |
| <i>R</i> ( <i>F</i> ) <sup>a</sup> ( <i>I</i> > 2 $\sigma$ ) | 0.0424                                                                   | 0.0532                                             |
| <i>WR</i> ( <i>F</i> <sup>2</sup> ) <sup>a</sup>             | 0.0998                                                                   | 0.1626                                             |
| Largest difference peak/hole (e/ Å <sup>3</sup> )            | + 0.346 / - 0.418                                                        | + 0.954 / - 0.463                                  |

<sup>a</sup> Quantity minimized =  $wR(F^2) = (\sum[w(F_o^2 - F_c^2)^2]) / \sum[(wF_o^2)^2]^{1/2}$ ;  $R = \sum\Delta / \sum(F_o)$ ,  $\Delta = |F_o - F_c|$ ,  $w = 1 / [\sigma^2(F_o^2) + (aP)^2 + bP]$ ,  $P = 2F_c^2 + \text{Max}(F_o, 0) / 3$

## Optimized Geometries in Cartesian Coordinates (Å)

Truncated Model Version of **2**, (4,4'-bipy){Ti(N[Me]Ph)<sub>3</sub>}<sub>2</sub>

|    |           |           |           |
|----|-----------|-----------|-----------|
| C  | -0.127856 | -0.019634 | 0.692230  |
| C  | 0.867200  | -0.345028 | 1.678584  |
| C  | 0.595316  | -0.364073 | 3.012997  |
| N  | -0.645226 | -0.071071 | 3.559384  |
| C  | -1.623071 | 0.227791  | 2.619120  |
| C  | -1.413577 | 0.257900  | 1.276618  |
| Ti | -1.136518 | -0.038298 | 5.500526  |
| N  | 0.345444  | -0.799950 | 6.478909  |
| C  | 1.519383  | 0.042700  | 6.726929  |
| C  | 0.454887  | -2.092782 | 7.070219  |
| C  | 0.833405  | -3.203043 | 6.300953  |
| C  | 0.965231  | -4.464568 | 6.883927  |
| C  | 0.723854  | -4.640785 | 8.246916  |
| C  | 0.346620  | -3.542595 | 9.023069  |
| C  | 0.216208  | -2.282430 | 8.441443  |
| N  | -2.748194 | -1.068594 | 5.743180  |
| C  | -2.889486 | -2.322077 | 4.992015  |
| C  | -3.871860 | -0.781186 | 6.568759  |
| C  | -3.828185 | -1.035460 | 7.947827  |
| C  | -4.936809 | -0.783687 | 8.757344  |
| C  | -6.113213 | -0.277746 | 8.205021  |
| C  | -6.169298 | -0.021495 | 6.832881  |
| C  | -5.061908 | -0.270543 | 6.023427  |
| N  | -1.422460 | 1.784326  | 6.041192  |
| C  | -1.417931 | 2.151867  | 7.458187  |
| C  | -1.797893 | 2.844439  | 5.163316  |
| C  | -3.134930 | 3.266377  | 5.064894  |
| C  | -3.495701 | 4.285404  | 4.183603  |
| C  | -2.531376 | 4.905987  | 3.386780  |
| C  | -1.200641 | 4.497529  | 3.481506  |
| C  | -0.837336 | 3.480430  | 4.363551  |
| H  | 1.880581  | -0.593082 | 1.386311  |
| H  | 1.374747  | -0.617996 | 3.723157  |
| H  | -2.606446 | 0.460754  | 3.016552  |
| H  | -2.265033 | 0.515285  | 0.658959  |
| H  | 1.381956  | 1.031686  | 6.279109  |
| H  | 2.428480  | -0.397881 | 6.290409  |
| H  | 1.710095  | 0.186340  | 7.800443  |
| H  | 1.031898  | -3.069148 | 5.240204  |
| H  | 1.261642  | -5.311450 | 6.268841  |
| H  | 0.826418  | -5.623132 | 8.700339  |
| H  | 0.149606  | -3.668468 | 10.085873 |
| H  | -0.077349 | -1.430099 | 9.050506  |
| H  | -2.922610 | -1.454913 | 8.376023  |
| H  | -4.882239 | -0.996243 | 9.822870  |

|    |           |           |            |
|----|-----------|-----------|------------|
| H  | -6.978716 | -0.089283 | 8.835011   |
| H  | -7.081299 | 0.374372  | 6.390480   |
| H  | -5.111055 | -0.068714 | 4.955891   |
| H  | -2.036556 | -2.468723 | 4.322518   |
| H  | -2.938782 | -3.188464 | 5.666126   |
| H  | -3.797774 | -2.324594 | 4.372651   |
| H  | -0.709038 | 2.970099  | 7.654604   |
| H  | -1.119234 | 1.295931  | 8.071945   |
| H  | -2.407432 | 2.475253  | 7.807357   |
| H  | -3.892451 | 2.780172  | 5.672753   |
| H  | -4.537877 | 4.590087  | 4.113393   |
| H  | -2.814671 | 5.695699  | 2.695404   |
| H  | -0.438851 | 4.969489  | 2.865359   |
| H  | 0.200837  | 3.166390  | 4.433964   |
| C  | 0.127856  | 0.019634  | -0.692230  |
| C  | -0.867200 | 0.345028  | -1.678584  |
| C  | -0.595316 | 0.364073  | -3.012997  |
| N  | 0.645226  | 0.071071  | -3.559384  |
| C  | 1.623071  | -0.227791 | -2.619120  |
| C  | 1.413577  | -0.257900 | -1.276618  |
| Ti | 1.136518  | 0.038298  | -5.500526  |
| N  | -0.345444 | 0.799950  | -6.478909  |
| C  | -1.519383 | -0.042700 | -6.726929  |
| C  | -0.454887 | 2.092782  | -7.070219  |
| C  | -0.833405 | 3.203043  | -6.300953  |
| C  | -0.965231 | 4.464568  | -6.883927  |
| C  | -0.723854 | 4.640785  | -8.246916  |
| C  | -0.346620 | 3.542595  | -9.023069  |
| C  | -0.216208 | 2.282430  | -8.441443  |
| N  | 2.748194  | 1.068594  | -5.743180  |
| C  | 2.889486  | 2.322077  | -4.992015  |
| C  | 3.871860  | 0.781186  | -6.568759  |
| C  | 3.828185  | 1.035460  | -7.947827  |
| C  | 4.936809  | 0.783687  | -8.757344  |
| C  | 6.113213  | 0.277746  | -8.205021  |
| C  | 6.169298  | 0.021495  | -6.832881  |
| C  | 5.061908  | 0.270543  | -6.023427  |
| N  | 1.422460  | -1.784326 | -6.041192  |
| C  | 1.417931  | -2.151867 | -7.458187  |
| C  | 1.797893  | -2.844439 | -5.163316  |
| C  | 3.134930  | -3.266377 | -5.064894  |
| C  | 3.495701  | -4.285404 | -4.183603  |
| C  | 2.531376  | -4.905987 | -3.386780  |
| C  | 1.200641  | -4.497529 | -3.481506  |
| C  | 0.837336  | -3.480430 | -4.363551  |
| H  | -1.880581 | 0.593082  | -1.386311  |
| H  | -1.374747 | 0.617996  | -3.723157  |
| H  | 2.606446  | -0.460754 | -3.016552  |
| H  | 2.265033  | -0.515285 | -0.658959  |
| H  | -1.381956 | -1.031686 | -6.279109  |
| H  | -2.428480 | 0.397881  | -6.290409  |
| H  | -1.710095 | -0.186340 | -7.800443  |
| H  | -1.031898 | 3.069148  | -5.240204  |
| H  | -1.261642 | 5.311450  | -6.268841  |
| H  | -0.826418 | 5.623132  | -8.700339  |
| H  | -0.149606 | 3.668468  | -10.085873 |
| H  | 0.077349  | 1.430099  | -9.050506  |



|   |           |           |           |
|---|-----------|-----------|-----------|
| H | 2.922610  | 1.454913  | -8.376023 |
| H | 4.882239  | 0.996243  | -9.822870 |
| H | 6.978716  | 0.089283  | -8.835011 |
| H | 7.081299  | -0.374372 | -6.390480 |
| H | 5.111055  | 0.068714  | -4.955891 |
| H | 2.036556  | 2.468723  | -4.322518 |
| H | 2.938782  | 3.188464  | -5.666126 |
| H | 3.797774  | 2.324594  | -4.372651 |
| H | 0.709038  | -2.970099 | -7.654604 |
| H | 1.119234  | -1.295931 | -8.071945 |
| H | 2.407432  | -2.475253 | -7.807357 |
| H | 3.892451  | -2.780172 | -5.672753 |
| H | 4.537877  | -4.590087 | -4.113393 |
| H | 2.814671  | -5.695699 | -2.695404 |
| H | 0.438851  | -4.969489 | -2.865359 |
| H | -0.200837 | -3.166390 | -4.433964 |
